# Supplementary material for: One Health Analysis of mcr-Carrying Plasmids and Emergence of mcr-10.1 in Three Species of Klebsiella Recovered from Humans in China
Source: PubMed Central journal article supplement (PMC9769640; doi:10.1128/spectrum.02306-22), 2022-10-26
Supplement: spectrum.02306-22-s0001.pdf [file spectrum.02306-22-s0001.pdf]

8 MIC values of the *mcr*-carrying isolates in this study are labeled. Identical bases are indicated by dots. (A) *phoP* (B) *phoQ* (C) *pmrA* (D) *pmrB* (E) *mgrB*



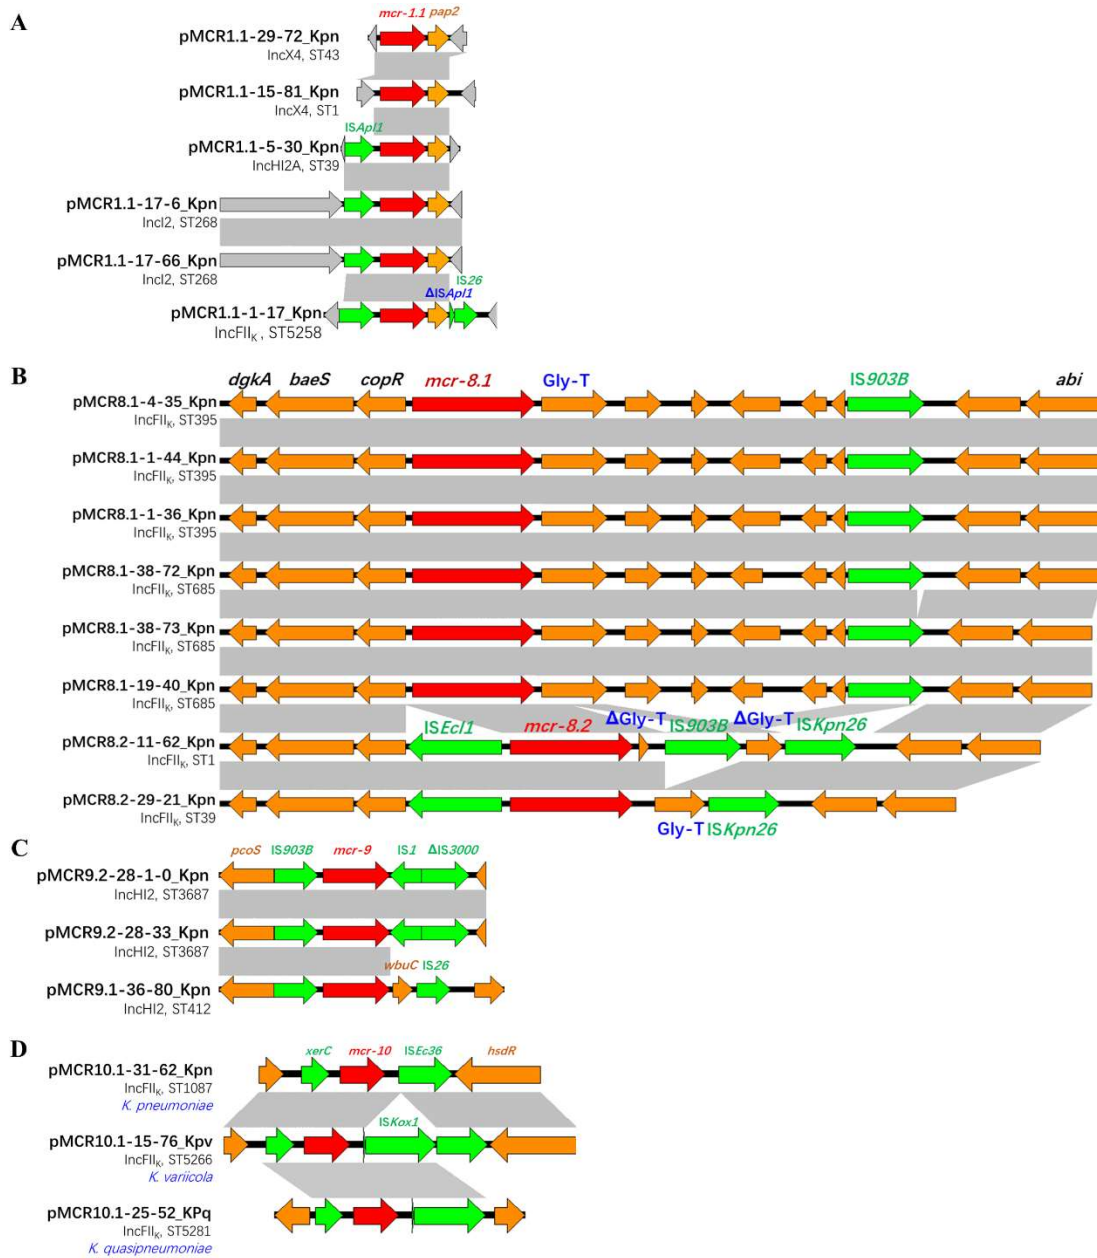

9

10 **Supplementary Figure 2 Characterization of *mcr* genetic contexts in this study**

11 The plasmid name and incompatibility groups are labeled for each sequence. The genes  
 12 and genetic elements are colored as follows: red for *mcr*, green for the mobile genetic  
 13 elements (MGEs), orange for the *mcr* adjacent genes, and gary for the hypothetical  
 14 proteins. Grey shadings connect highly similar sequences. (A) *mcr-1* (B) *mcr-8* (C)  
 15 *mcr-9* (D) *mcr-10*
